# Supplementary material
Source: HighWire-hosted journal article supplement (https://fn.bmj.com/content/101/4/F357)
Supplement: inline-supplementary-material-1 [file inline-supplementary-material-1.pdf]

1. Water
2. Underwater
3. Pool
4. Bath
5. Tub
6. Hydrotherapy
7. Baths
8. 1 OR 2 OR 3 OR 4 OR 5 OR 6 OR 7
9. Birth
10. Births
11. Delivery
12. Deliveries
13. Delivered
14. Labour
15. Labor
16. Intrapartum
17. Birthing
18. 9 OR 10 OR 11 OR 12 OR 13 OR 14 OR 15 OR 16 OR 17
19. Waterbirth
20. Waterbirths
21. 19 OR 20
22. (8 AND 18) OR 21

## Supplementary File B: Risk of bias assessment and Quality scoring

### Modified Critical Appraisal Skills Programme (CASP) criteria

#### Randomised Controlled Trials (RCT):

- 1. Does the trial have relevant extractable data? Yes/No**
- Answer yes if all of the following are met:
    - Population = mothers at term (can be any risk level) and neonates not diagnosed as stillborn prior to onset of labour
    - Intervention = waterbirth (delivery of baby underwater)
    - Comparator = vaginal delivery into air
    - Outcome = One or more neonatal outcome reported

*Note if answer = No, study is excluded from systematic review as per inclusion and exclusion criteria*

- 2. Do the authors state that this is a randomised controlled trial, or that the allocation of participants was randomised? Yes/No**

*Note if answer = No, study is not an RCT - determine study design and use appropriate tool*

- 3. Were participants appropriately allocated to intervention and control groups; was this process truly random, and was it valid? Yes/No/Can't tell**

*Trials may stratify randomisation by age, parity or other acceptable variables. Differences in baseline characteristics between groups should be noted.*

- 4. Was the person performing data collection blinded? Yes /No/Can't tell**

- 5. Were all participants accounted for at trial conclusion? Yes/No/Can't tell**

- 6. Did study design avoid significant contamination between groups? Yes/No**

*Note if per-protocol analysis was performed = No. If >25% of women in waterbirth group delivered on land score = No.*

- 7. Were follow up and data collection performed in the same way for intervention and control groups? Yes/No/Can't tell**

- 8. Was a power calculation performed, and if so was the sample size sufficient to detect a difference in neonatal outcomes? Yes/No**

*Note a study appropriately powered to detect a difference in a maternal outcome does not satisfy this criterion.*

- 9. Are results presented adequately? Yes/Partial/No**

*Note that:*

- 'No' indicates only written reporting of outcomes, such as 'no significant difference' without any numerical data.
- 'Partial' indicates reporting of numerical data, such as a median APGAR, but without standard deviation, statistical analysis, or confidence intervals where they would have been of value.
- 'Yes' indicates numerical data with standard deviations, statistical analysis and confidence intervals where appropriate.

- 10. Does this study report a range of neonatal outcomes? Yes/No**

*Note: Yes = 3 or more neonatal outcomes. No = 1 or 2*

**Scoring: Yes = 2, Partial = 1, Can't tell = 0, No = 0**

## Supplementary File B: Risk of bias assessment and Quality scoring

### Prospective Cohort Studies (PCS)

**1. Does the study have relevant extractable data? Yes/No**

- Answer yes if all of the following are met:
  - Population = mothers at term (can be any risk level) and neonates not diagnosed as stillborn prior to onset of labour
  - Risk factor = waterbirth (delivery of baby underwater)
  - Outcome = One or more neonatal outcome reported

*Note if answer = No, study is excluded from systematic review as per inclusion and exclusion criteria*

**2. Were the same exclusion criteria for the waterbirth group applied to land birth group? Yes/No/Can't tell**

*Note: women in control group should have same risk profile as waterbirth group*

**3. Did women in land birth group receive equivalent intrapartum care? Yes/No/Can't tell**

**4. Were baseline characteristics of the two groups the same? If not was this accounted for in statistical analysis? Yes/No/Can't tell**

*Note important confounding factors include maternal age, parity, maternal risk*

**5. Was the person performing data collection blinded, or was data taken from a reliable source, e.g. the medical record? Yes/No/Can't tell**

**6. Were all participants accounted for at study conclusion? Yes/No/Can't tell**

**7. Were follow up and data collection performed in the same way for both groups? Yes/No/Can't tell**

**8. Are results presented adequately? Yes/Partial/No**

*Note that:*

- 'No' indicates only written reporting of outcomes, such as 'no significant difference' without any numerical data.
- 'Partial' indicates reporting of numerical data, such as a median APGAR, but without standard deviation, statistical analysis, or confidence intervals where they would have been of value.
- 'Yes' indicates numerical data with standard deviations, statistical analysis and confidence intervals where appropriate.

**9. Does this study report a range of neonatal outcomes? Yes/No**

*Note: Yes = 3 or more neonatal outcomes. No = 1 or 2*

**Scoring: Yes = 2, Partial = 1, Can't tell = 0, No = 0, Mixed = 0, Low = 0**

## Supplementary File B: Risk of bias assessment and Quality scoring

### Retrospective Cohort Studies (RCS) and Case Control Studies (CCS)

- 1. Does the study have relevant extractable data? Yes/No**
  - Answer yes if all of the following are met:
    - Population = mothers at term (can be any risk level) and neonates not diagnosed as stillborn prior to onset of labour
    - Risk factor = waterbirth (delivery of baby underwater)
    - Outcome = One or more neonatal outcome reported

*Note if answer = No, study is excluded from systematic review as per inclusion and exclusion criteria*
- 2. Were the same exclusion criteria for the waterbirth group applied to control group? Yes/No/Can't tell**

*Note: women in control group should have same risk profile as waterbirth group*
- 3. Did women in control group receive equivalent intrapartum care? Yes/No/Can't tell**
- 4. Were baseline characteristics of the two groups the same? If not was this accounted for in statistical analysis? Yes/No/Can't tell**

*Note important confounding factors include maternal age, parity, maternal risk*
- 5. Was data collected from a reliable source, e.g. the medical record? Yes/No/Can't tell**
- 6. Were follow up and data collection performed in the same way for both groups? Yes/No/Can't tell**
- 7. Are results presented adequately? Yes/Partial/No**

*Note that:*

  - 'No' indicates only written reporting of outcomes, such as 'no significant difference' without any numerical data.
  - 'Partial' indicates reporting of numerical data, such as a median APGAR, but without standard deviation, statistical analysis, or confidence intervals where they would have been of value.
  - 'Yes' indicates numerical data with standard deviations, statistical analysis and confidence intervals where appropriate.
- 8. Does this study report a range of neonatal outcomes? Yes/No**

*Note: Yes = 3 or more neonatal outcomes. No = 1 or 2*

**Scoring: Yes = 2, Partial = 1, Can't tell = 0, No = 0, Mixed = 0, Low = 0**

## Supplementary File B: Risk of bias assessment and Quality scoring

### Cross Sectional Study or Surveillance Study

**1. Does the study have relevant extractable data? Yes/No**

- Answer yes if all of the following are met:
  - Population = mothers at term (can be any risk level) and neonates not diagnosed as stillborn prior to onset of labour
  - Risk factor = waterbirth (delivery of baby underwater)
  - Outcome = One or more neonatal outcome reported

*Note if answer = No, study is excluded from systematic review as per inclusion and exclusion criteria*

**2. Are women in waterbirth group comparable to general population of women having waterbirth? Yes/No/Can't tell**

**3. Is the waterbirth group comparable to the control group? Yes/No/Can't tell**

*Note: women in control group should have same risk profile as waterbirth group*

**4. Did women in control group receive equivalent intrapartum care? Yes/No/Can't tell**

**5. Was data collected from a reliable source, e.g. the medical record? Yes/No/Can't tell**

**6. Was data collection performed in the same way for both groups? Yes/No/Can't tell**

**7. Are results presented adequately? Yes/Partial/No**

*Note that:*

- 'No' indicates only written reporting of outcomes, such as 'no significant difference' without any numerical data.
- 'Partial' indicates reporting of numerical data, such as a median APGAR, but without standard deviation, statistical analysis, or confidence intervals where they would have been of value.
- 'Yes' indicates numerical data with standard deviations, statistical analysis and confidence intervals where appropriate.

**8. Does this study report a range of neonatal outcomes? Yes/No**

*Note: Yes = 3 or more neonatal outcomes. No = 1 or 2*

**Scoring: Yes = 2, Partial = 1, Can't tell = 0, No = 0**

## Supplementary File B: Risk of bias assessment and Quality scoring

### Quality Scores of Included Papers

| Author, Year, Country                               | Study Design | Modified CASP Criteria |   |   |   |   |   |   |   |   |    | Total |
|-----------------------------------------------------|--------------|------------------------|---|---|---|---|---|---|---|---|----|-------|
|                                                     |              | 1                      | 2 | 3 | 4 | 5 | 6 | 7 | 8 | 9 | 10 |       |
| Nikodem, 1999.(48)<br>South Africa                  | RCT          | Y                      | Y | Y | N | Y | Y | Y | N | Y | Y  | 16    |
| Woodward et al. 2004.(40)<br>UK                     | RCT          | Y                      | Y | Y | U | Y | N | Y | N | Y | Y  | 14    |
| Ghasemi et al. 2013.(52)<br>Iran                    | RCT          | Y                      | Y | U | N | Y | Y | Y | N | Y | Y  | 14    |
| Gayiti et al. 2015.(53) China                       | RCT          | Y                      | Y | U | U | Y | Y | U | N | Y | N  | 10    |
| Chaichian et al. 2009.(54)<br>Iran                  | RCT          | Y                      | Y | U | U | U | Y | Y | N | N | N  | 8     |
| Woodward et al. 2004.(40) UK                        | PCS          | Y                      | Y | U | Y | U | Y | Y | Y | Y |    | 14    |
| Mollamahmutoglu et al. 2012.(55)<br>Turkey          | PCS          | Y                      | Y | U | N | N | Y | Y | Y | Y |    | 12    |
| Zanetti-Dällenbacht et al. 2007.(46)<br>Switzerland | PCS          | Y                      | Y | N | N | N | Y | Y | Y | Y |    | 12    |
| Ros, 2009.(49)<br>South Africa                      | PCS          | Y                      | Y | U | U | N | Y | Y | P | Y |    | 11    |
| Hawkins, 1995.(56)<br>UK                            | PCS          | Y                      | Y | U | U | N | Y | Y | P | Y |    | 11    |
| Geissbühler et al. 2003.(41)<br>Switzerland         | PCS          | Y                      | N | U | N | U | Y | Y | Y | Y |    | 10    |
| Torkamani et al. 2010.(44) Iran                     | PCS          | Y                      | U | U | N | N | Y | Y | P | Y |    | 9     |
| Sipinski et al. 2000.(57) Poland                    | PCS          | Y                      | U | U | U | U | U | U | Y | N |    | 4     |
| Menakaya et al. 2012.(43) Australia                 | RCS          | Y                      | Y | Y | Y | Y | Y | Y | N |   |    | 14    |
| Bodner et al. 2002.(58) Austria                     | RCS          | Y                      | Y | Y | Y | N | Y | Y | Y |   |    | 14    |
| Otigbah et al. 2000.(47)<br>UK                      | RCS          | Y                      | Y | U | Y | Y | Y | Y | Y |   |    | 14    |
| Schröcksnadel et al. 2003.(45)<br>Austria           | RCS          | Y                      | U | N | U | Y | Y | Y | N |   |    | 10    |
| Kolivand et al. 2014.(59)<br>Iran                   | RCS          | Y                      | Y | U | Y | Y | Y | P | N |   |    | 10    |
| Pagano et al. 2010.(60)<br>Italy                    | RCS          | Y                      | U | U | Y | U | Y | Y | N |   |    | 8     |
| Aird et al. 1997.(63)<br>UK                         | RCS          | Y                      | N | Y | Y | U | U | N | N |   |    | 6     |

## Supplementary File B: Risk of bias assessment and Quality scoring

|                                             |                 |   |       |   |   |   |   |   |   |  |  |    |
|---------------------------------------------|-----------------|---|-------|---|---|---|---|---|---|--|--|----|
| Kowalewska et al. 2004.(61) Poland          | RCS             | Y | U     | U | N | Y | Y | P | N |  |  | 7  |
| Pellantova et al. 2003. (62) Czech Republic | RCS             | Y | Y     | U | N | U | U | P | Y |  |  | 7  |
| Burke et al. 1995.(64) UK                   | RCS             | Y | N / U | U | U | Y | Y | N | N |  |  | 6  |
| Thoni et al. 2010.(65) Italy                | RCS             | Y | U     | U | U | U | U | Y | Y |  |  | 6  |
| Garland et al. 2002.(66) UK                 | RCS             | Y | N     | U | Y | U | U | P | N |  |  | 5  |
| Moneta et al. 2001.(67) Poland              | RCS             | Y | U     | U | N | U | U | N | N |  |  | 2  |
| Carpenter et al. 2012.(68) New Zealand      | Case control    | Y | U     | Y | Y | Y | Y | Y | Y |  |  | 14 |
| Dahlen et al. 2013.(69) Australia           | Cross sectional | Y | Y     | U | Y | N | Y | P | N |  |  | 9  |
| Gilbert et al. 1999.(42) UK                 | Surveillance    | Y | Y     | U | U | N | N | Y | Y |  |  | 8  |

## Supplementary File B: Risk of bias assessment and Quality scoring

### Funnel Plots of selected outcomes

#### Funnel Plots

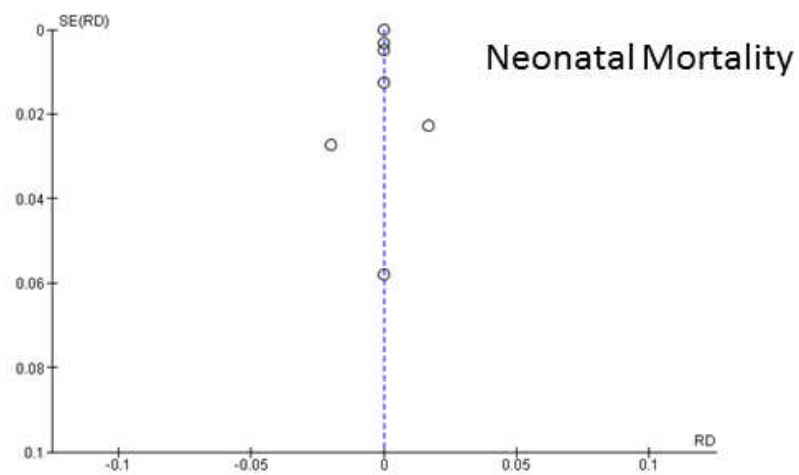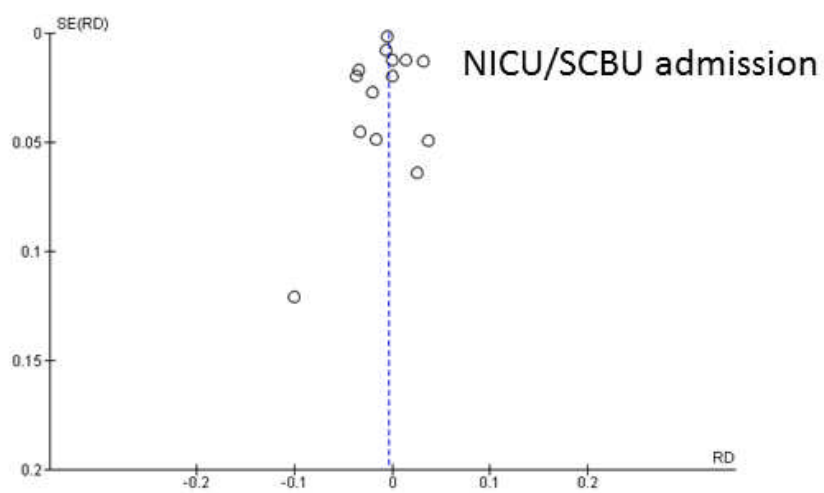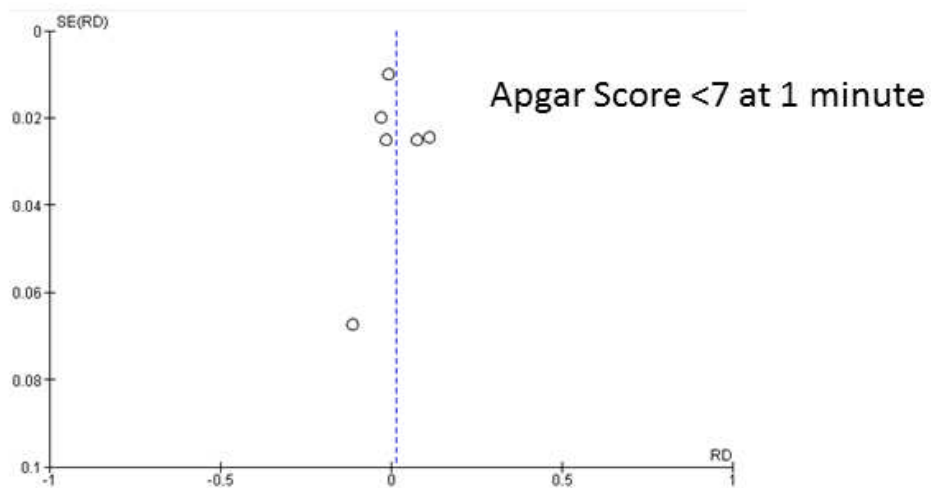



## Supplementary File C. Tabulated data on neonatal outcomes

### Outcomes of Waterbirth: Neonatal Mortality

| Study                            | Study design    | n    |         | Mortality, n (%) |            | Risk Difference /1000 (95% CI)                                           |
|----------------------------------|-----------------|------|---------|------------------|------------|--------------------------------------------------------------------------|
|                                  |                 | WB   | Control | WB               | Control    |                                                                          |
| Nikodem, 1999.(48)               | RCT             | 60   | 60      | 1 (1.7%)         | 0          | 17<br>(-45, 89)                                                          |
| Mollamahmutoglu et al. 2012.(55) | PCS             | 207  | 204     | 0                | 0          | 0<br>(-18, 18)                                                           |
| Hawkins, 1995.(56)               | PCS             | 16   | 16      | 0                | 0          | 0<br>(-194, 194)                                                         |
| Geissbühler et al. 2003.(41)*    | PCS             | 3617 | 5901    | 0                | 0          | 0<br>(-1, 1)                                                             |
| Torkamani et al. 2010.(44)*      | PCS             | 50   | 50      | 0                | 1 (2.0%)   | -20<br>(-105, 53)                                                        |
| Otigbah et al. 2000.(47)         | RCS             | 301  | 301     | 0                | 0          | 0<br>(-13, 13)                                                           |
| Aird et al. 1997.(63)*           | RCS             | 67   | 100     | 0                | 0          | 0<br>(-37, 54)                                                           |
| Carpenter et al. 2012.(68)*      | CCS             | 14   | 26      | 1 (7.1%)         | 0          | 71<br>(-70, 315)                                                         |
| Dahlen et al. 2013.(69)*         | Cross Sectional | 819  | 5220    | 1 (0.12%)        | 4 (0.077%) | 0<br>(-1, 6)                                                             |
| Gilbert et al. 1999.(42)*        | Surveillance    | 4032 | 10307   | 5 (0.12%)        | 14 (0.14%) | 0<br>(-1, 2)                                                             |
| <b>Combined Data</b>             |                 | 584  | 581     | 1                | 0          | 0 (-1, 1)<br>Heterogeneity:<br>Tau <sup>2</sup> = 0, I <sup>2</sup> = 0% |

Key: \*studies not included in meta-analysis (combined data)

### Outcomes of Waterbirth: SCBU/ NICU Admission

| Author, Year                        | Study Design | n    |         | SCBU/NICU, n (%) |            | Risk Difference /1000 (95% CI)                                          |
|-------------------------------------|--------------|------|---------|------------------|------------|-------------------------------------------------------------------------|
|                                     |              | WB   | Control | WB               | Control    |                                                                         |
| Nikodem, 1999.(48)                  | RCT          | 60   | 60      | 3 (5.0%)         | 5 (8.3%)   | -33<br>(-136, 66)                                                       |
| Woodward et al. 2004.(40)           | RCT          | 40   | 20      | 3 (7.5%)         | 1 (5.0%)   | 25<br>(-168, 155)                                                       |
| Ghasemi et al. 2013.(52)            | RCT          | 83   | 88      | 9 (10.8%)        | 11 (12.5%) | -17<br>(-115, 84)                                                       |
| Woodward et al. 2004.(40)           | PCS          | 10   | 10      | 0                | 1 (10%)    | -100<br>(-404, 189)                                                     |
| Mollamahmutoglu et al. 2012.(55)    | PCS          | 207  | 204     | 5 (2.5%)         | 2 (1%)     | 14<br>(-14, 46)                                                         |
| Zanetti-Dällenbach et al. 2007.(46) | PCS          | 89   | 146     | 0                | 5 (3.4%)   | -34<br>(-78, 12)                                                        |
| Ros, 2009.(49)                      | PCS          | 27   | 27      | 1 (3.7%)         | 0          | 37<br>(-91, 183)                                                        |
| Geissbühler et al. 2003.(41)*       | PCS          | 3617 | 5901    | 25<br>(0.69%)    | 74 (1.3%)  | -6<br>(-10, 1)                                                          |
| Torkamani et al. 2010.(44)*         | PCS          | 50   | 50      | 0                | 1 (2%)     | -20<br>(-105, 53)                                                       |
| Menakaya et al. 2012.(43)*          | RCS          | 219  | 219     | 8 (3.7%)         | 1 (0.45%)  | 32<br>(4, 66)                                                           |
| Otigbah et al. 2000.(47)            | RCS          | 301  | 301     | 2 (0.66%)        | 4 (1.3%)   | -7<br>(-28, 12)                                                         |
| Schröcksnadel et al. 2003.(45)*     | RCS          | 218  | 218     | 6 (2.7%)         | 14 (5.3%)  | -37<br>(-80, 4)                                                         |
| Pellantova et al. 2003. (62)*       | RCS          | 70   | 70      | 1                | 1          | 0<br>(-63, 63)                                                          |
| Aird et al. 1997.(63)*              | RCS          | 67   | 100     | 0                | 0          | 0<br>(-37, 54)                                                          |
| Gilbert et al. 1999.(42)            | Surveillance | 4032 | 10307   | 34<br>(0.84%)    | 380 (3.7%) | -28<br>(-33,-24)                                                        |
| <b>Combined Data</b>                |              | 817  | 856     | 23               | 29         | -1 (-2, 1)<br>Heterogeneity:<br>Tau <sup>2</sup> =0, I <sup>2</sup> =3% |

## Outcomes of Waterbirth: Apgar Scores

### Studies reporting numerical Apgar scores

| Author, year                        | Study Design | n    |         | Apgar 1 min                                                                                     |              |                       | Apgar 5 min                                                                                           |              |                         |
|-------------------------------------|--------------|------|---------|-------------------------------------------------------------------------------------------------|--------------|-----------------------|-------------------------------------------------------------------------------------------------------|--------------|-------------------------|
|                                     |              | WB   | Control | WB                                                                                              | Control      | Difference            | WB                                                                                                    | Control      | Difference              |
| Ghasemi et al. 2013.(52)            | RCT          | 83   | 88      | 8.94 (±0.23)                                                                                    | 8.81 (±0.49) | 0.13<br>(0.014, 0.25) | 9.21 (±0.44)                                                                                          | 9.02 (±0.14) | 0.19<br>(0.09, 0.29)    |
| Gayiti et al., 2015.(53)            | RCT          | 60   | 60      | 9.26 (±0.51)                                                                                    | 9.28 (±0.47) | -0.02<br>(-0.2, 0.16) | 9.34 (±0.49)                                                                                          | 9.34 (±0.52) | 0<br>(-0.18, 0.18)      |
| Zanetti-Dällenbach et al. 2007.(46) | PCS          | 89   | 146     | 8.7(±0.8)                                                                                       | 8.6 (±1.0)   | 0.1<br>(-0.15, 0.35)  | 9.8 (±0.5)                                                                                            | 9.8 (±0.5)   | 0<br>(-0.13, 0.13)      |
| Ros, 2009.(49)*                     | PCS          | 27   | 27      | 8.4 (7-9)                                                                                       | 8.15 (3-9)   | 0.25                  | 8.93 (8-9)                                                                                            | 8.81 (6-9)   | 0.12                    |
| Geissbühler et al., 2003.(41)*      | PCS          | 3617 | 5901    |                                                                                                 |              |                       | 9.83 (±0.43)                                                                                          | 9.98 (±0.27) | -0.15<br>(-0.16, -0.14) |
| Sipinski et al. 2000.(57)*          | PCS          | 135  | 135     | 9.8 (7-10)                                                                                      | 9.6 (6-10)   | 0.2                   |                                                                                                       |              |                         |
| Otigbah et al. 2000.(47)*           | RCS          | 301  | 301     | 8.4                                                                                             | 8.51         | -0.11                 | 9.57                                                                                                  | 9.58         | -0.01                   |
| Schröcksnadel et al. 2003.(45)*     | RCS          | 218  | 218     |                                                                                                 |              |                       | 10 (6-10)                                                                                             | 10 (5-10)    | 0                       |
| Pagano et al. 2010.(60)*            | RCS          | 110  | 110     | 9.48                                                                                            | 9.28         | 0.2                   | 9.95                                                                                                  | 9.84         | 0.11                    |
| Pellantova et al. 2003. (62)*       | RCS          | 70   | 70      | 8.5                                                                                             | 8.9          | -0.4                  | 9.6                                                                                                   | 9.7          | -0.1                    |
| Moneta et al. 2001.(67)*            | RCS          | 109  | 110     |                                                                                                 |              |                       | 10                                                                                                    | 10           | 0                       |
| Carpenter et al. 2012.(68)*         | CCS          | 14   | 26      | 7                                                                                               | 8            | -1.0                  |                                                                                                       |              |                         |
| <b>Combined Data</b>                |              | 232  | 294     | Combined difference: 0.09 (0, 0.18)<br>Heterogeneity: Tau <sup>2</sup> =0.0, I <sup>2</sup> =0% |              |                       | Combined difference: 0.07 (-0.07, 0.21)<br>Heterogeneity: Tau <sup>2</sup> =0.01, I <sup>2</sup> =69% |              |                         |

Data presented as mean (± standard deviation), median (range), or difference (95% confidence interval). Key: \*study not included in meta-analysis

Studies reporting number in neonates with Apgar score <7

| Author, year                     | Study Design | N   |         | Apgar 1 min <7                                               |                         |                         | Apgar 5 min <7                                             |                         |                        |
|----------------------------------|--------------|-----|---------|--------------------------------------------------------------|-------------------------|-------------------------|------------------------------------------------------------|-------------------------|------------------------|
|                                  |              | WB  | Control | WB                                                           | Control                 | RD%                     | WB                                                         | Control                 | RD%                    |
| Nikodem, 1999.(48)               | RCT          | 60  | 60      |                                                              |                         |                         | 2 (3.3%)                                                   | 0                       | 3.3%<br>(-3.2, 11.4%)  |
| Mollamahmutoglu et al. 2012.(55) | PCS          | 207 | 204     | 26 (12.6%)                                                   | 3 (1.5%)                | 11.1%<br>(6.4, 16.4%)   | 0                                                          | 0                       | 0%<br>(-1.8, 1.8%)     |
| Ros, 2009.(49)                   | PCS          | 27  | 27      | 0                                                            | 3 (11.1%)               | -11.1%<br>(-28.1, 3.3%) | 0                                                          | 1 (3.7%)                | -3.7%<br>(-18.3, 9.1%) |
| Menakaya et al. 2012.(43)*       | RCS          | 219 | 219     | 25 (11.4%)                                                   | 8 (3.7%)                | 7.8%<br>(2.8, 13%)      | 2 (1%)                                                     | 0                       | 0.9%<br>(-0.9, 3%)     |
| Bodner et al., 2002.(58)*        | RCS          | 140 | 140     | 2 (1.4%)                                                     | 6 (4.3%)                | -2.9%<br>(-7.7, 1.4%)   | 1 (0.71%)                                                  | 1 (0.71%)               | 0%<br>(-3.3, 3.3%)     |
| Kolivand et al. 2014.(59)        | RCS          | 43  | 62      | 0                                                            | 1 (1.6%)                | -1.6%<br>(-8.6, 6.7%)   |                                                            |                         |                        |
| Garland et al. 2002.(66)*        | RCS          | 680 | 680     | 22 (3.2%)                                                    | 26 (3.8%)               | -0.6%<br>(-2.6, 1.4%)   |                                                            |                         |                        |
| <b>Combined Data</b>             |              |     |         | Events: 26<br>Total: 277                                     | Events: 7<br>Total: 293 | RD%: 1%<br>(-11, 12%)   | Events: 2<br>Total: 294                                    | Events: 1<br>Total: 291 | 0%<br>(-1, 1%)         |
|                                  |              |     |         | Heterogeneity: Tau <sup>2</sup> =0.01 , I <sup>2</sup> = 89% |                         |                         | Heterogeneity: Tau <sup>2</sup> = 0.0, I <sup>2</sup> = 0% |                         |                        |

Data presented as n (%), Risk difference percentage (RD%) (95% confidence interval). Key: \*study not included in meta-analysis

### Studies reporting number in neonates with Apgar score <8

| Author, year                                               | Study Design | N  |         | Apgar 1 min <8 |         |     | Apgar 5 min <8         |                        |                        |
|------------------------------------------------------------|--------------|----|---------|----------------|---------|-----|------------------------|------------------------|------------------------|
|                                                            |              | WB | Control | WB             | Control | RD% | WB                     | Control                | RD%                    |
| Woodward et al. 2004.(40)                                  | RCT          | 40 | 20      |                |         |     | 1 (2.5%)               | 0                      | 2.5%<br>(-13.7, 12.9%) |
| Woodward et al. 2004.(40)                                  | PCS          | 10 | 10      |                |         |     | 0                      | 0                      | 0%<br>(-27.8, 27.8%)   |
| Hawkins, 1995.(56)                                         | PCS          | 16 | 16      |                |         |     | 0                      | 0                      | 0%<br>(-19.4, 19.4%)   |
| Torkamani et al. 2010.(44)*                                | PCS          | 50 | 50      |                |         |     | 0                      | 7 (14.6%)              | -14%<br>(-26.2, -4%)   |
| <b>Combined Data</b>                                       |              |    |         |                |         |     | Events: 1<br>Total: 66 | Events: 0<br>Total: 46 | RD%: 1%<br>(-5, 8%)    |
| Heterogeneity: Tau <sup>2</sup> = 0.0, I <sup>2</sup> = 0% |              |    |         |                |         |     |                        |                        |                        |

Data presented as n (%), Risk difference percentage (RD%) (95% confidence interval). Key: \*study not included in meta-analysis

### Studies with descriptive report of Apgar scores

| Author, year                 | Study Design | n   |         | Descriptive reports of Apgar scores               |
|------------------------------|--------------|-----|---------|---------------------------------------------------|
|                              |              | WB  | Control |                                                   |
| Chaichian et al., 2009.(54)* | RCT          | 53  | 53      | "No difference" in 1 min or 5 min Apgar           |
| Burke et al. 1995.(64)*      | RCS          | 50  | 50      | "Mean Apgar scores were the same for both groups" |
| Dahlen et al., 2013.(69)*    | CSS          | 819 | 5220    | "No significant difference" in 5 min Apgar        |

Key: \*study not included in meta-analysis

## Outcomes of Waterbirth: Umbilical Cord Gases

| Author, year                        | Design | n    |         | Arterial pH                                 |                                              |                            | Venous pH                                  |                                            |                            |
|-------------------------------------|--------|------|---------|---------------------------------------------|----------------------------------------------|----------------------------|--------------------------------------------|--------------------------------------------|----------------------------|
|                                     |        | WB   | Control | WB                                          | Control                                      | Analysis                   | WB                                         | Control                                    | Analysis                   |
| Woodward et al. 2004.(40)           | RCT    | 40   | 20      | Median: 7.23<br>Range: 7.04-7.40<br>(n=35)  | Median: 7.18<br>Range: 7.05-7.26<br>(n=13)   | NS                         | Median: 7.32<br>Range: 7.15-7.52<br>(n=36) | Median: 7.33<br>7.15-7.42) (n=16)          | NS                         |
| Woodward et al. 2004.(40)           | PCS    | 10   | 10      | Median: 7.24<br>Range: 7.16-7.37<br>(n=7)   | Median: 7.2<br>Range: 7.12-7.3<br>(n=7)      |                            | Median: 7.28<br>Range: 7.2-7.48<br>(n=5)   | Median: 7.33<br>Range: 7.27-7.49<br>(n=10) |                            |
| Zanetti-Dällenbach et al. 2007.(46) | PCS    | 89   | 146     | Mean: 7.26 (±0.06)<br>95% range: 7.14-7.38  | Mean: 7.24 (±0.08)<br>95% range: 7.08-7.39   | MD: 0.02<br>(0.0, 0.04)    | Mean: 7.38 (±0.07)<br>95% range: 7.24-7.52 | Mean: 7.35 (±0.05)<br>95% range: 7.25-7.45 | MD: 0.03<br>(0.015, 0.045) |
| Ros, 2009.(49)                      | PCS    | 27   | 27      | Median: 7.27<br>Range: 7.09-7.43<br>(n=21)  | Median: 7.30<br>Range: 7.0-7.36<br>(n=18)    |                            |                                            |                                            |                            |
| Geissbühler et al., 2003.(41)       | PCS    | 3617 | 5901    | Mean: 7.29 (±0.09)<br>95% range: 7.11-7.47  | Mean: 7.27 (±0.08)<br>95% range: 7.11-7.42   | MD: 0.02<br>(0.017, 0.023) |                                            |                                            |                            |
| Schröcksnadel et al. 2003.(45)      | RCS    | 218  | 218     | Median: 7.29<br>Range: 7.09-7.53            | Median: 7.26<br>Range: 7.06-7.45             | p = 0.001                  |                                            |                                            |                            |
| Thoni et al. 2010.(65)              | RCS    | 2625 | 899     | Median: 7.24<br>Range: 7.0-7.47<br>(n=1826) | Median: 7.23<br>Range: 6.91-7.46<br>(n=1334) | NS                         |                                            |                                            |                            |
|                                     |        |      |         | <b>Arterial pH &lt;7.1</b>                  |                                              |                            | <b>RD%</b>                                 |                                            |                            |
| Bodner et al., 2002.(58)            | RCS    | 140  | 140     | 3 (2.1%)                                    | 4 (2.9%)                                     | -0.7%<br>(-5.2, 3.6%)      |                                            |                                            |                            |
|                                     |        |      |         | <b>Arterial pH &lt;7.2</b>                  |                                              |                            |                                            |                                            |                            |
| Nikodem, 1999.(48)                  | RCT    | 60   | 60      | 12 (n=57)                                   | 14 (n=59)                                    | -2.7%<br>(-17.6, 12.5%)    |                                            |                                            |                            |

Data presented as mean ( $\pm$  standard deviation), or n (%). When cord gas analysis is not performed on the whole group then n is given beneath the data (n= ). Key: MD = mean difference (95% confidence interval); RD<sub>%</sub>= risk difference percentage (95% confidence interval); NS = not significant; p = p value. NS and p values are taken from non-parametric significance tests performed by original study authors.

## Supplementary File D. Sensitivity Analyses

| Outcome                                 | Primary analysis |          |                                                                                       | Sensitivity Analyses    |          |                                                                                     |           |          |                                                                                      |
|-----------------------------------------|------------------|----------|---------------------------------------------------------------------------------------|-------------------------|----------|-------------------------------------------------------------------------------------|-----------|----------|--------------------------------------------------------------------------------------|
|                                         | n studies        | n births | Outcome (95% CI)                                                                      | High Quality Score Only |          |                                                                                     | RCT only  |          |                                                                                      |
|                                         |                  |          |                                                                                       | n studies               | n births | Outcome (95% CI)                                                                    | n studies | n births | Outcome (95% CI)                                                                     |
| Neonatal Mortality, RD <sub>1000</sub>  | 4                | 1165     | 0 (-10, 10)<br>Heterogeneity:<br>Tau <sup>2</sup> = 0.0, I <sup>2</sup> = 0%          | 4                       | 1165     | 0 (-10, 10)<br>Heterogeneity:<br>Tau <sup>2</sup> = 0.0, I <sup>2</sup> = 0%        | 1         | 120      | 20 (-30, 60)<br>Heterogeneity:<br>Not applicable                                     |
| NICU-SCBU admission, RD <sub>1000</sub> | 8                | 1673     | 10 (-20, 10)<br>Heterogeneity:<br>Tau <sup>2</sup> = 0.0, I <sup>2</sup> = 3%         | 9                       | 2111     | 0 (-20, 20)<br>Heterogeneity:<br>Tau <sup>2</sup> = 0.0, I <sup>2</sup> = 40%       | 3         | 351      | -10 (-70, 40)<br>Heterogeneity:<br>Tau <sup>2</sup> = 0.0, I <sup>2</sup> = 0%       |
| Apgar score at 1 min, mean difference   | 3                | 526      | 0.09 (0, 0.18)<br>Heterogeneity:<br>Tau <sup>2</sup> = 0.0, I <sup>2</sup> = 0%       | 2                       | 406      | 0.12(0.02, 0.23)<br>Heterogeneity:<br>Tau <sup>2</sup> = 0.0, I <sup>2</sup> = 0%   | 2         | 291      | 0.07 (-0.07, 0.21)<br>Heterogeneity:<br>Tau <sup>2</sup> = 0.1, I <sup>2</sup> = 49% |
| Apgar score at 5 min, mean difference   | 3                | 526      | 0.07 (-0.07, 0.21)<br>Heterogeneity:<br>Tau <sup>2</sup> = 0.01, I <sup>2</sup> = 69% | 2                       | 406      | 0.1 (-0.09, 0.29)<br>Heterogeneity:<br>Tau <sup>2</sup> = 0.1, I <sup>2</sup> = 80% | 2         | 291      | 0.11 (-0.07, 0.29)<br>Heterogeneity:<br>Tau <sup>2</sup> = 0.1, I <sup>2</sup> = 69% |
| Apgar score <7 at 1 min, RD %           | 3                | 570      | 1 (-11, 12)<br>Heterogeneity:<br>Tau <sup>2</sup> = 0.01, I <sup>2</sup> = 89%        | 4                       | 1183     | 1 (-6, 11)<br>Heterogeneity:<br>Tau <sup>2</sup> = 0.01, I <sup>2</sup> = 89%       | 0         |          |                                                                                      |
| Apgar score <7 at 5 min, RD %           | 3                | 585      | 0 (-1, 1)<br>Heterogeneity:<br>Tau <sup>2</sup> = 0.00, I <sup>2</sup> = 0%           | 5                       | 1303     | 0 (0, 1)<br>Heterogeneity:<br>Tau <sup>2</sup> = 0.00, I <sup>2</sup> = 0%          | 1         | 120      | 3 (-2, 9)<br>Heterogeneity:<br>Not applicable                                        |
| Apgar score <8 at 5 min, RD %           | 3                | 112      | 1 (-5, 8)<br>Heterogeneity:<br>Tau <sup>2</sup> = 0.0, I <sup>2</sup> = 0%            | 3                       | 112      | 1 (-5, 8)<br>Heterogeneity:<br>Tau <sup>2</sup> = 0.00, I <sup>2</sup> = 0%         | 1         | 60       | 3 (-6, 11)<br>Heterogeneity:<br>Not applicable                                       |

Key: RD<sub>1000</sub> = risk difference per 1000 live births, RD % = risk difference percentage, CI = confidence interval



## Supplementary File E. Excluded papers

| Author, Year                        | Reason for Exclusion                                                                                                                                                                                                                                                                                                                                              |
|-------------------------------------|-------------------------------------------------------------------------------------------------------------------------------------------------------------------------------------------------------------------------------------------------------------------------------------------------------------------------------------------------------------------|
| Burns et al. 2012 (29)              | Not a comparative study.                                                                                                                                                                                                                                                                                                                                          |
| Henderson et al. 2014 (30)          | Data is not separated for WI and WB.                                                                                                                                                                                                                                                                                                                              |
| Rush 1999 (31)                      | Data is not separated for WI and WB.                                                                                                                                                                                                                                                                                                                              |
| Da Silva et al. 2006 (32)           | Data is not separated for WI and WB.                                                                                                                                                                                                                                                                                                                              |
| Geissbühler et al. 2004 (33)        | There are multiple publications by the same author describing the same cohort. In addition to the excluded paper cited here, three earlier papers were also excluded.<br>All papers describing this cohort were reviewed. The 2003 paper contained all relevant extractable data for the largest number of births and was selected for inclusion.(41)             |
| Zanetti-Dällenbach et al. 2006 (34) | There are multiple publications by the same author describing the same cohort. In addition to the excluded paper cited here, two other papers were also excluded.<br>All papers describing this cohort were reviewed. One of the 2007 papers contained all relevant extractable data and was selected for inclusion.(46)                                          |
| Thoni et al, 2007 (35)              | There are multiple publications by the same author describing the same cohort. In addition to the excluded paper cited here, three other papers were also excluded.<br>All papers describing this cohort were reviewed. The most recent paper (2010) described all relevant extractable data for the largest number of births and was selected for inclusion.(65) |
| Damodaran et al. 2010 (36)          | Conference abstract with no extractable qualitative data.                                                                                                                                                                                                                                                                                                         |
| Lim et al. 2015 (37)                | Conference abstract with no extractable qualitative data.                                                                                                                                                                                                                                                                                                         |
| Ziolkowski et al. 2009 (38)         | Paper is not available in any UK reference library and is unavailable online. Unable to contact author.                                                                                                                                                                                                                                                           |
| Price 1995 (39)                     | PhD thesis not available in any UK reference library and unavailable online. Unable to contact author.                                                                                                                                                                                                                                                            |
